# Supplementary material for: Rapid resolution of carbohydrate isomers via multi-site derivatization ion mobility-mass spectrometry
Source: Royal Society of Chemistry journal article supplement (doi:10.1039/c7an01796k), 2018-01-01

## Supporting information

### **Rapid Resolution of Carbohydrate Isomers via Multi-site Derivatization Ion Mobility-Mass Spectrometry**

Li Li,<sup>ab</sup> Kristin R. McKenna,<sup>ab</sup> Zhao Li,<sup>ab</sup> Mahipal Yadav,<sup>ac</sup> Ramanarayanan Krishnamurthy,<sup>ac</sup> Charles L. Liotta<sup>ab</sup> and  
Facundo M. Fernández<sup>ab</sup>

---

<sup>a</sup>NSF/NASA Center for Chemical Evolution

<sup>b</sup>School of Chemistry and Biochemistry, Georgia Institute of Technology, Atlanta, GA  
30332-0400, 901 Atlantic Dr. NW, Atlanta, GA, USA.

E-mail: facundo.fernandez@chemistry.gatech.edu; Fax: +1 (404) 894-7452;

Tel: +1 (404) 385-4432

<sup>c</sup>Department of Chemistry, The Scripps Research Institute, 10550 North Torrey Pines Road, La Jolla, CA 92037 USA

**Figure S1.** Singly-labelled disaccharides' drift time overlay at  $m/z$  516.121.

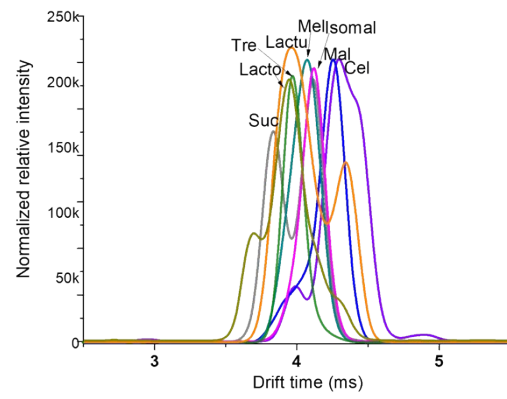

**Figure S2.** Mass spectra of reaction mixtures for individual sugar isomers reacted with 3C5NBA. The reaction was incubated at room temperature in aqueous solution, at a sugar:3C5NBA ratio of 1:2. For disaccharides, the incubation time was 5 minutes, whereas for monosaccharides it was 30 minutes. The time required for each measurement was approximately 15 minutes, including all the rinsing steps, etc. (Note: Singly-labeled species,  $m/z$  516.1310 highlighted in green; the doubly labelled species,  $m/z$

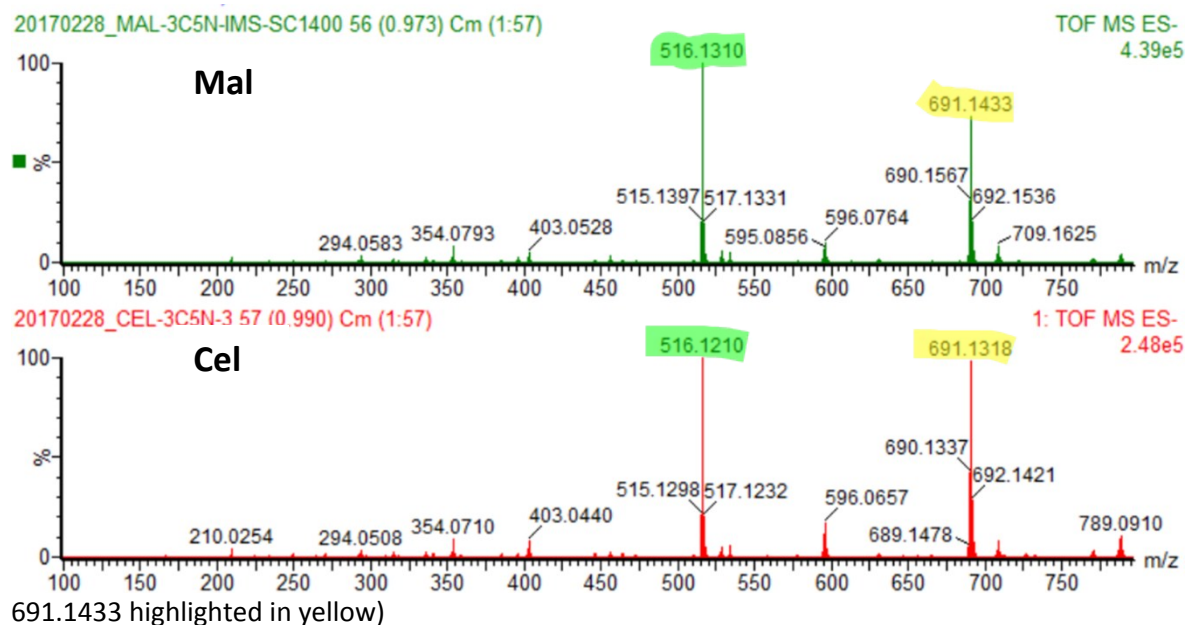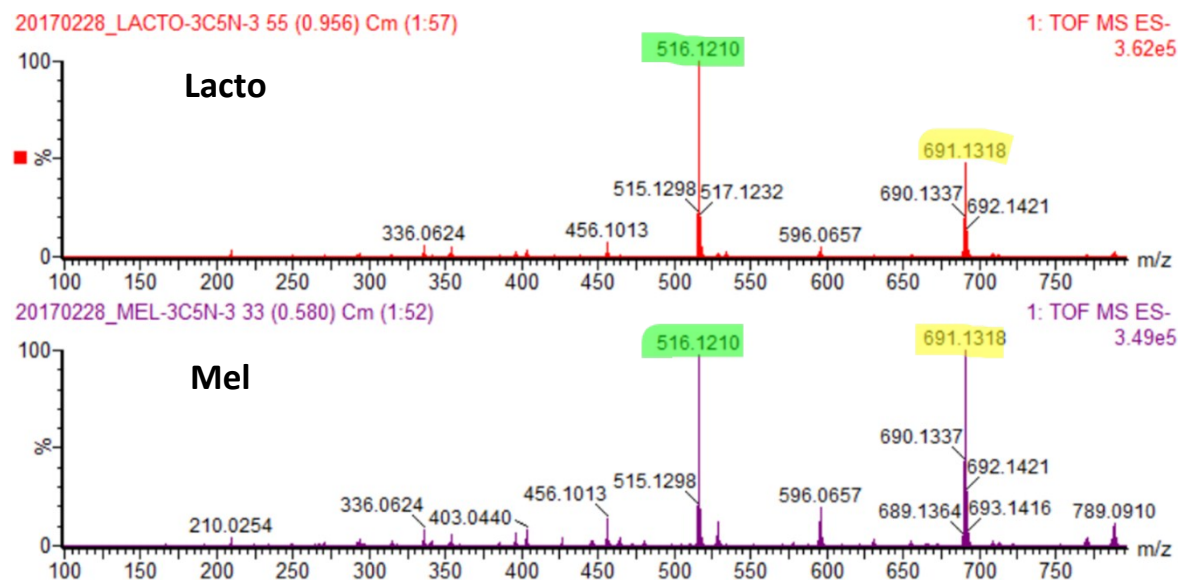

20170228\_SUCR-3C5N-3 12 (0.222) Cm (1:55)

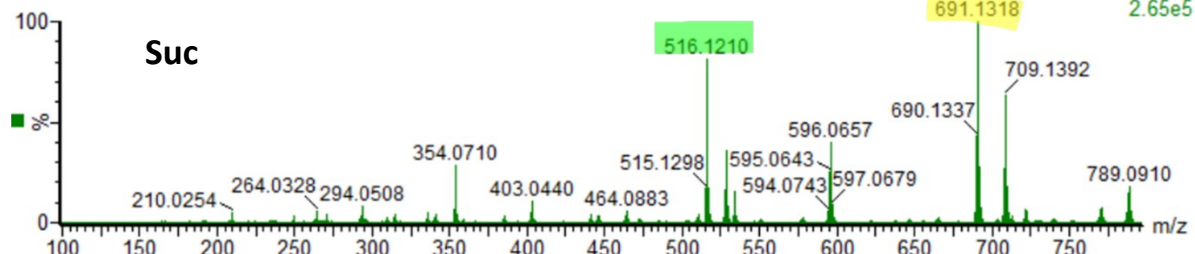

20170228\_LACTU-3C5N-3 20 (0.358) Cm (5:57)

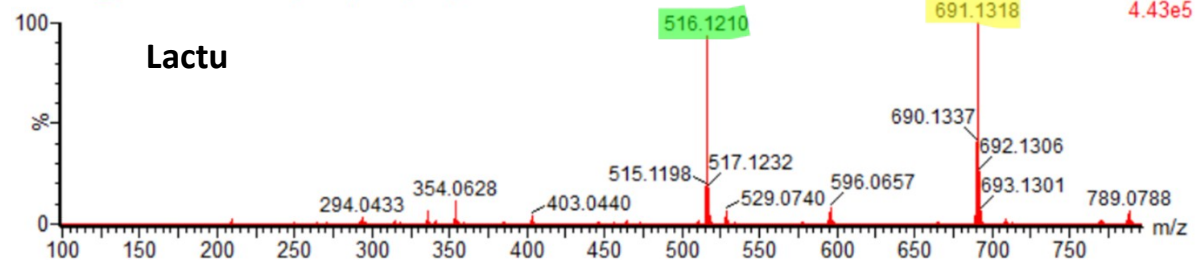

20170228\_TRE-3C5N-3 55 (0.956) Cm (1:57)

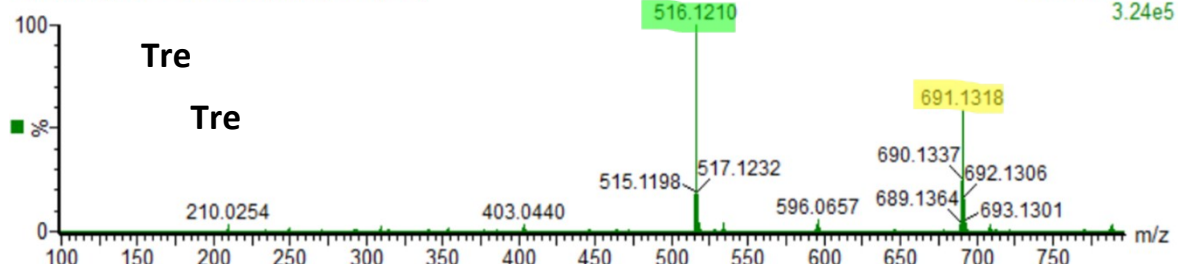

20170228\_ISOMAL-3C5N-3 57 (0.990) Cm (1:57)

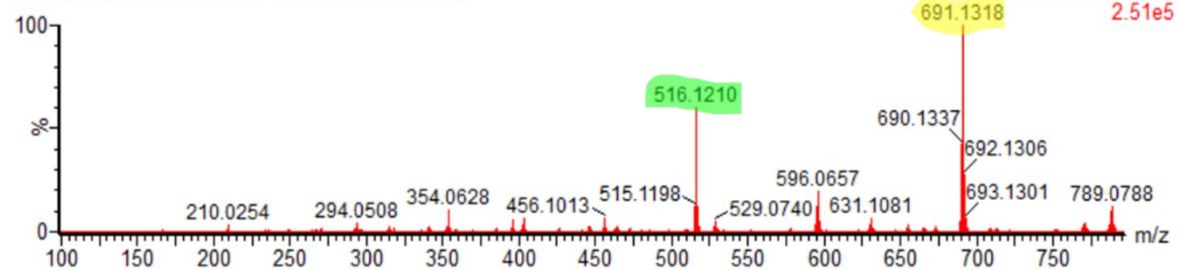

20170302\_D-GLU-3C5N-3 1 (0.034) Cm (1:56)

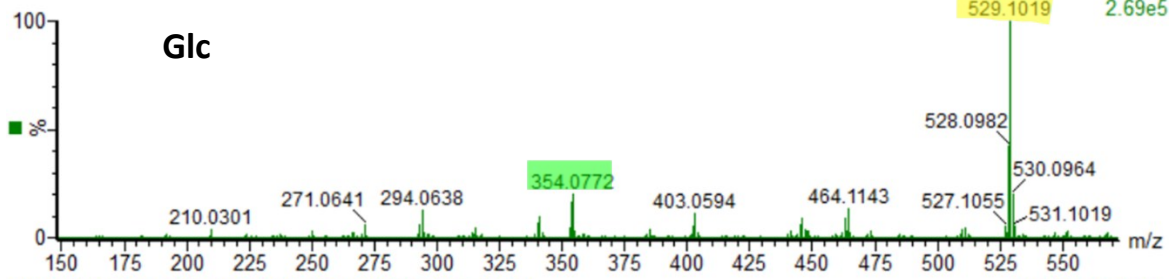

20170302\_D-GALACTOSE-3C5N-3 56 (0.973) Cm (1:57)

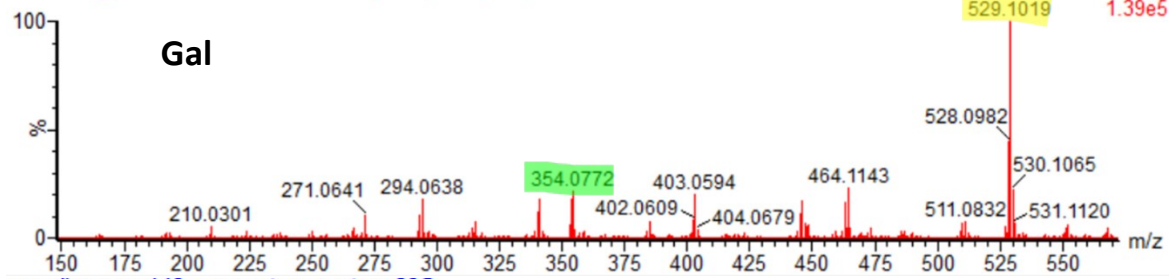

sampling cone140, source temperature 80C

20170302\_D-MANNOSE-3C5N-3 43 (0.751) Cm (2:57)

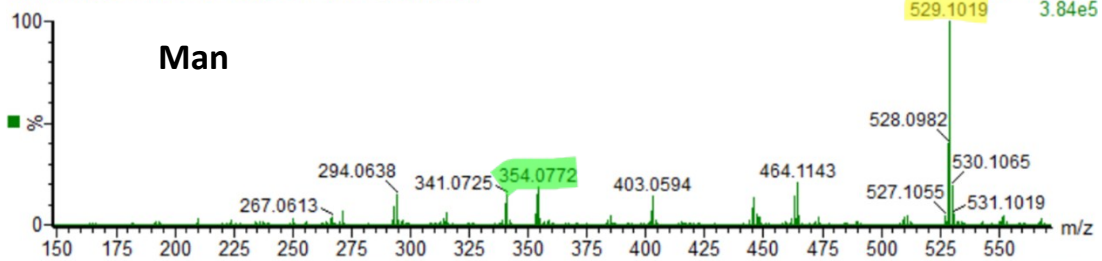

20170302\_D-FRUCTOSE-3C5N-3 49 (0.853) Cm (1:57)

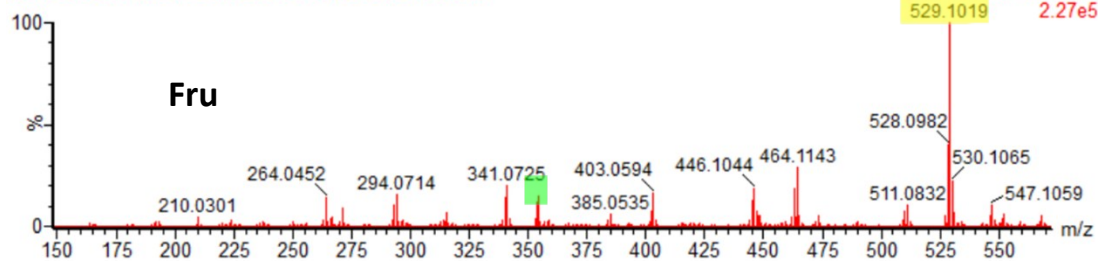

**Figure S3.** Fragmentation spectra of mobility-resolved 3C5NBA derivatives of each disaccharide at  $m/z$  691.132 (collision energy=40 V), and monosaccharide at  $m/z$  529.10. All characteristic fragments for each species are highlighted. The disaccharide neutral exact mass is 342.1162 Da, 3C5NBA is 211.0288 and the doubly-labelled neutral product is 692.1316. Abbreviations: maltose (Mal), melibiose (Mel), cellobiose (Cel), isomaltose (Isomal), lactose (Lacto), sucrose (Suc), trehalose (Tre).

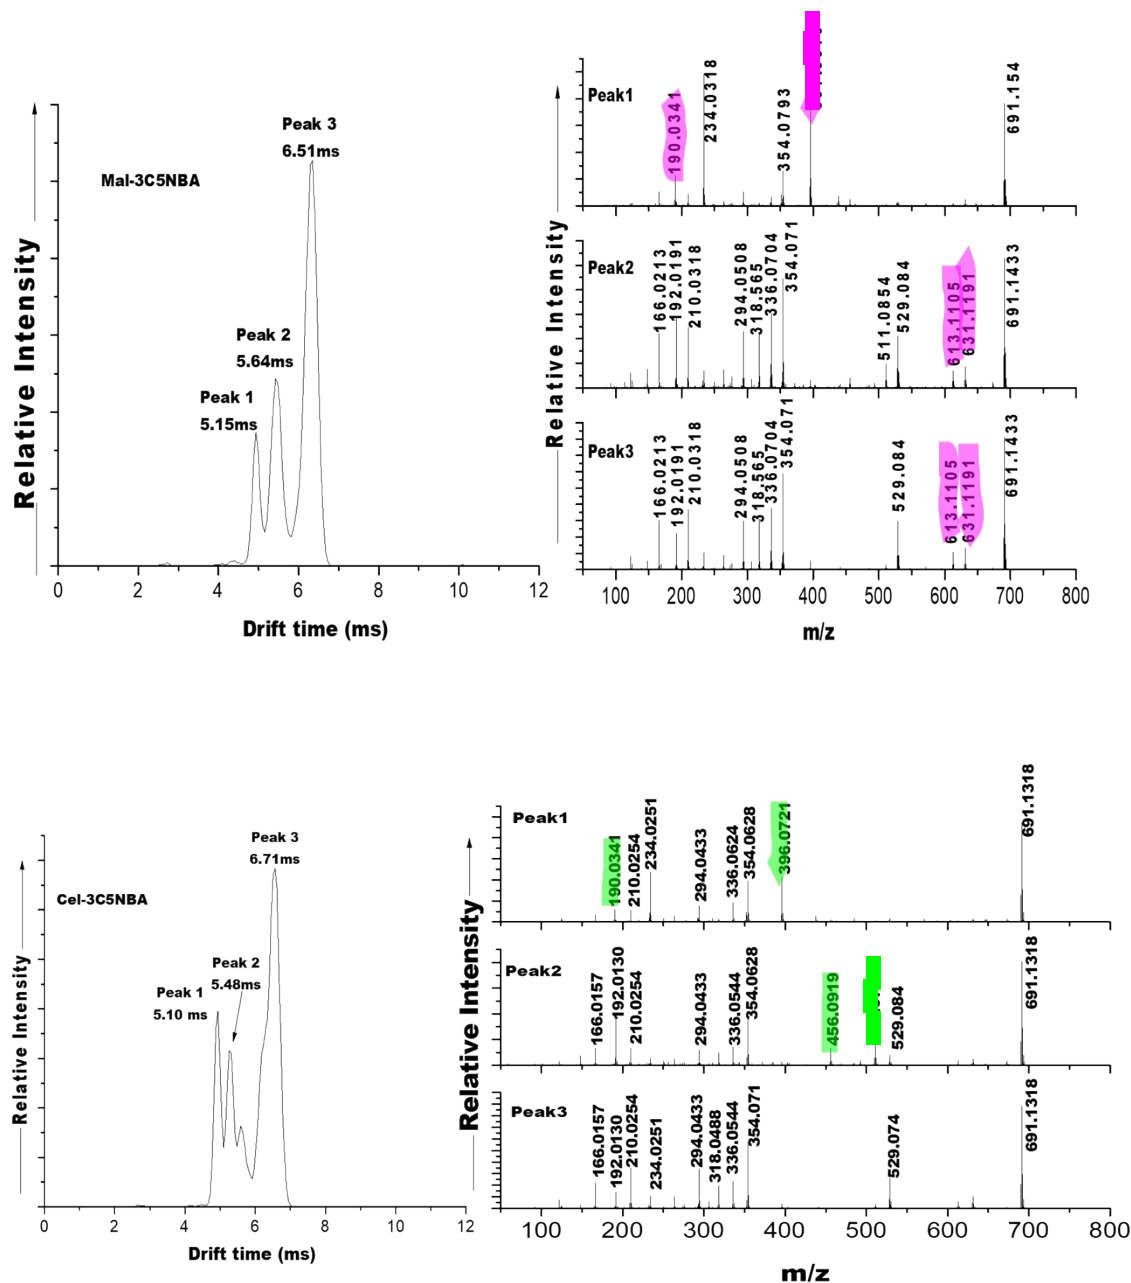

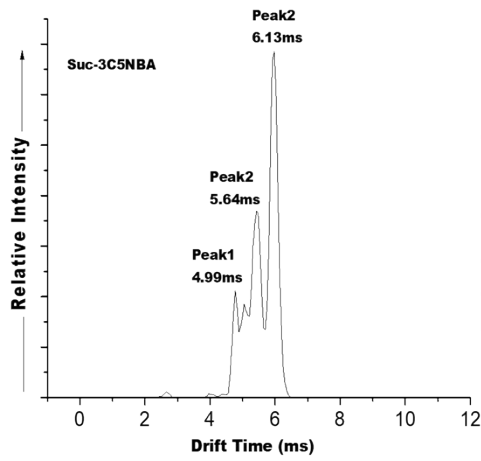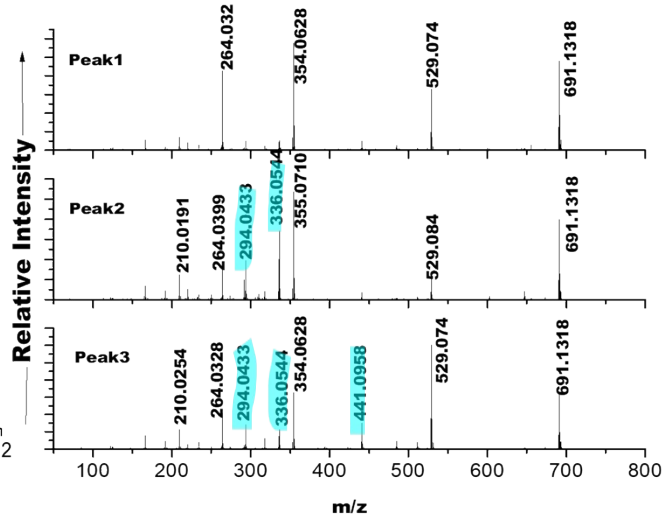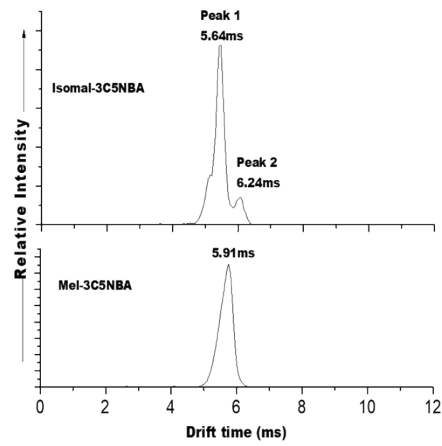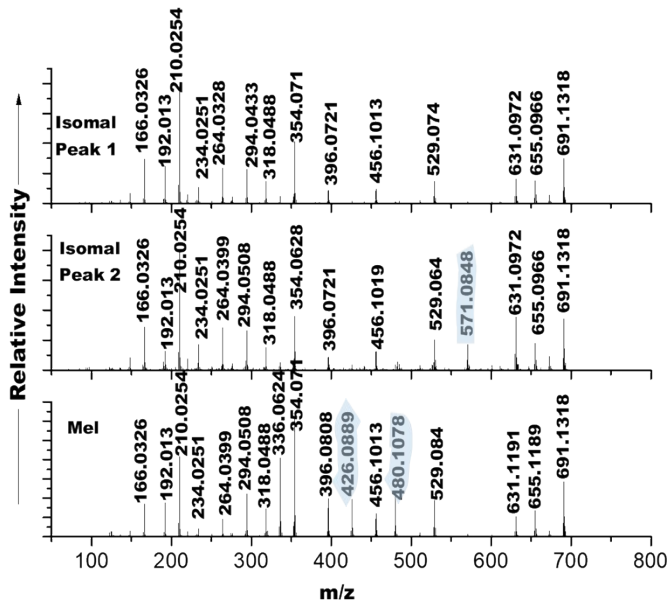

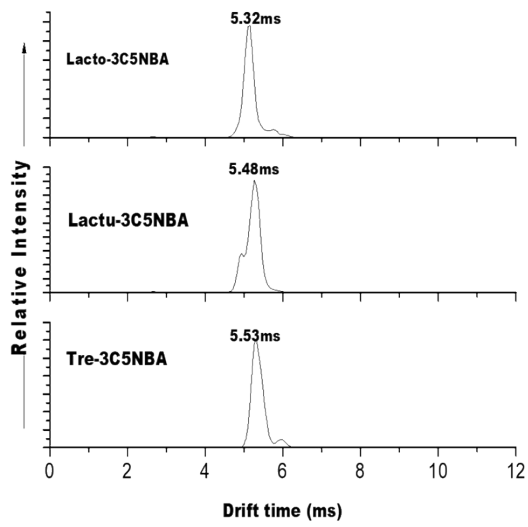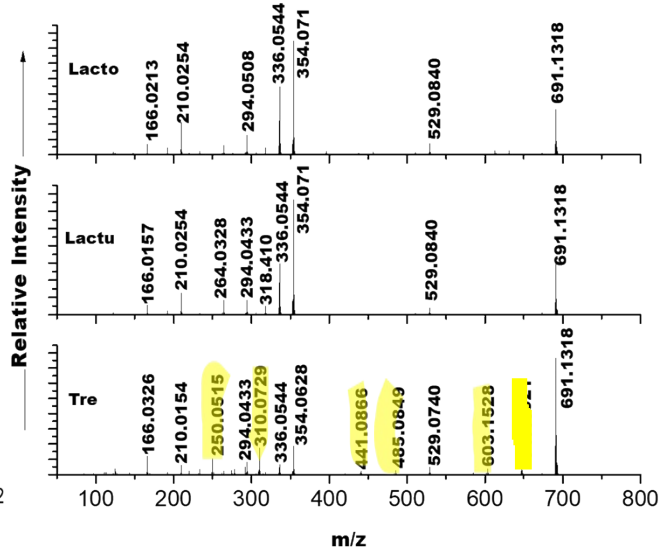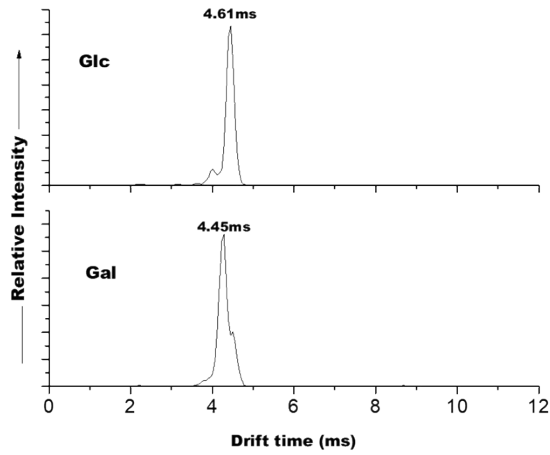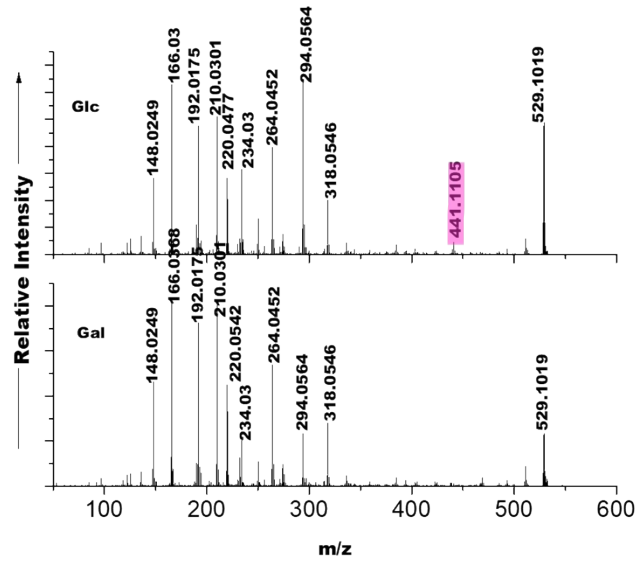



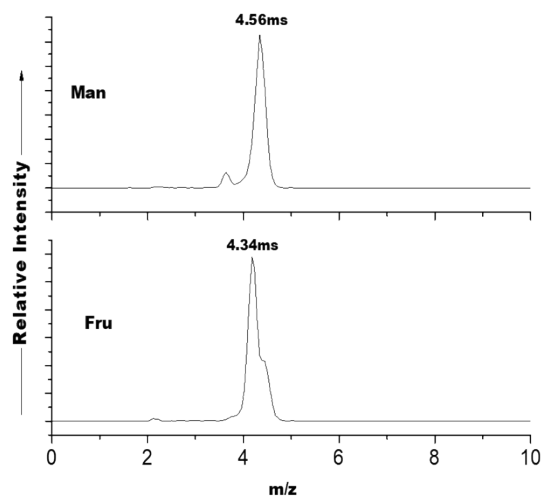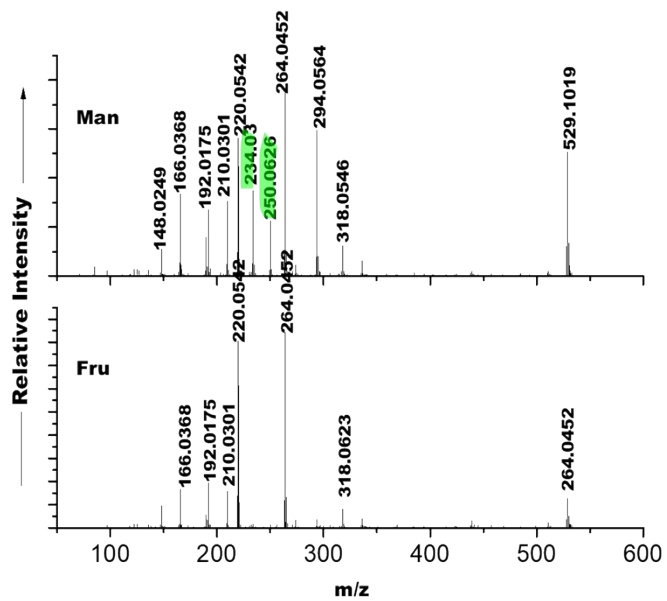

Supplement: c7an01796k1.pdf [file c7an01796k1.pdf]
